# Supplementary material for: CO2 hydrogenation to light olefins over Zn–Zr/support-SAPO-34: comparison of different supports
Source: Royal Society of Chemistry journal article supplement (doi:10.1039/d4nj03946g), 2024-01-01
Supplement: d4nj03946g1.pdf [file d4nj03946g1.pdf]

## **CO<sub>2</sub> hydrogenation to light olefins over Zn-Zr/Support-SAPO-34:**

### **Comparison of different supports**

Peng Lu,<sup>a</sup> Qianwen Hu,<sup>a</sup> Kui Wang,<sup>a</sup> Shiyong Chen,<sup>a</sup> Zongxiao Li,<sup>a</sup> Xinjie Chen,<sup>a</sup> Chuang Xing,<sup>a</sup>  
Yanhong Wang\*<sup>a</sup> and Ce Du\*<sup>b</sup>

---

<sup>a</sup> School of Biological and Chemical Engineering, Zhejiang University of Science and Technology, Hangzhou 310023, PR China. E-mail:

wyh@zust.edu.cn

<sup>b</sup> School of Environmental and Natural Resources, Zhejiang University of Science and Technology, Hangzhou 310023, PR China. E-mail:

duce1125@163.com

---

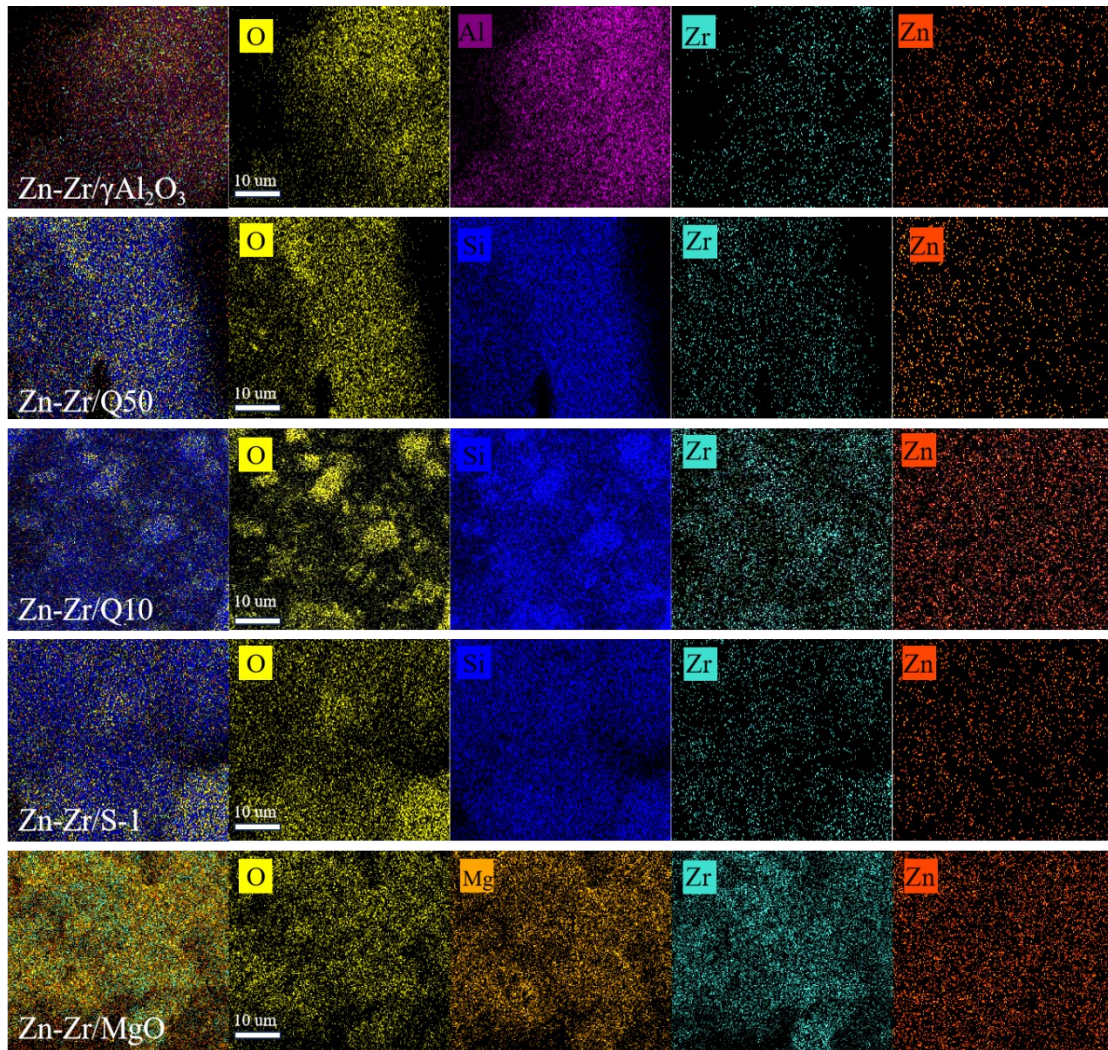

**Fig. S1** The elemental mapping images of Zn-Zr/ $\gamma$ Al<sub>2</sub>O<sub>3</sub>, Zn-Zr/Q50, Zn-Zr/Q10, Zn-Zr/S-1 and Zn-Zr/MgO.

**Table S1** The Relationship between CO<sub>2</sub> chemisorption, H<sub>2</sub> dissociative adsorption and catalytic activity, light olefin selectivity using different supports

| Zn-Zr/Support                                  | CO <sub>2</sub> medium and strong adsorption (mmol/g) | H <sub>2</sub> strong adsorption (mmol/g) | Zn-Zr/Support-SAPO-34    |                                |
|------------------------------------------------|-------------------------------------------------------|-------------------------------------------|--------------------------|--------------------------------|
|                                                |                                                       |                                           | CO <sub>2</sub> Con. (%) | C <sub>2</sub> -C <sub>4</sub> |
| Zn-Zr/Q50                                      | 0.120                                                 | 0.036                                     | 9.2                      | 28.1                           |
| Zn-Zr/Q10                                      | 0.150                                                 | 0.053                                     | 11.4                     | 39.0                           |
| Zn-Zr/S-1                                      | 0.164                                                 | 0.047                                     | 16.2                     | 14.7                           |
| Zn-Zr/MgO                                      | 0.185                                                 | 0.049                                     | 8.8                      | 4.8                            |
| Zn-Zr/ $\gamma$ Al <sub>2</sub> O <sub>3</sub> | 0.738                                                 | 0.420                                     | 24.0                     | 30.4                           |

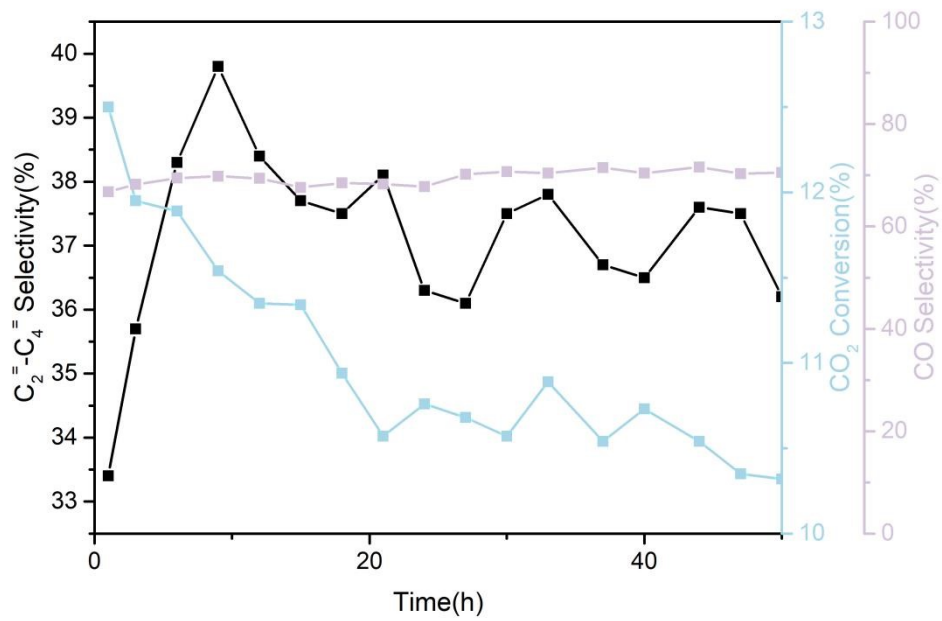

**Fig. S2** Stability of Zn-Zr/Q10-SAPO-34 catalyst with time-on-stream. (Reaction conditions: 3.0 MPa, 380 °C, gas flow = 40 mL/min, gas mixture: Ar:CO<sub>2</sub>:H<sub>2</sub> = 0.04:0.23:0.73)
